# Supplementary material for: Solution plasma exfoliation of graphene flakes from graphite electrodes
Source: Royal Society of Chemistry journal article supplement (doi:10.1039/c4ra03253e), 2014-01-01
Supplement: c4ra03253e1.pdf [file c4ra03253e1.pdf]

Supplementary information for H S Lee, M A Bratescu, T Ueno, N Saito

*Solution plasma exfoliation of graphene flakes from graphite electrodes*

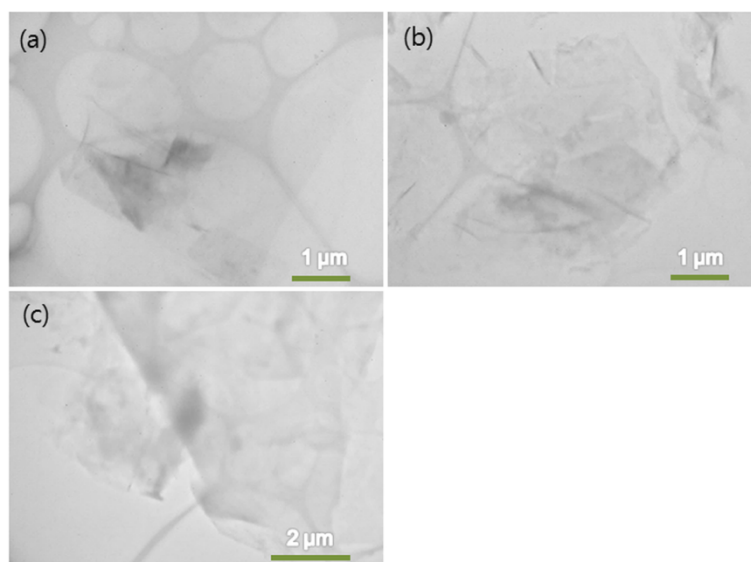

Figure S1 Disordered multilayers images at low-magnification TEM observed in graphene flakes.

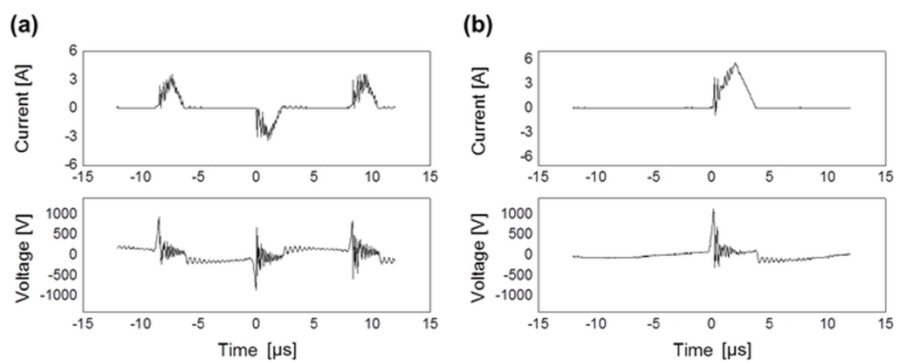

Figure S2 Typical current and voltage waveforms during production of (a) carbon onions and (b) graphene flakes by solution plasma processing.

Table S Identification of the excited species in OES [1S, 2S].

| Species       | $\lambda$ (nm) | Transition                        |
|---------------|----------------|-----------------------------------|
| H $_{\alpha}$ | 656.3          | 3d $\rightarrow$ 2p               |
| H $_{\beta}$  | 486.1          | 4d $\rightarrow$ 2p               |
| H $_{\gamma}$ | 434.0          | 5d $\rightarrow$ 2p               |
| O             | 777.4          | $^5P \rightarrow ^5S^0$           |
|               | 844.6          | $^3P \rightarrow ^3S^0$           |
| C             | 247.8          | $^1P^0 \rightarrow ^1S$           |
| Si            | 288.1          | $^1P^0 \rightarrow ^1D$           |
| CH            | 389.0          | B $^2\Sigma \rightarrow X^2\Pi$   |
| CO            | 243.4          | A $^1\Pi \rightarrow X^1\Sigma$   |
|               | 251.1          | A $^1\Pi \rightarrow X^1\Sigma$   |
|               | 263.0          | A $^1\Pi \rightarrow X^1\Sigma$   |
|               | 643.3          | d $^3\Delta \rightarrow a^3\Pi$   |
| C $_2$        | 473.7          | A $^3\Pi_g \rightarrow X'^3\Pi_u$ |
|               | 516.5          | A $^3\Pi_g \rightarrow X'^3\Pi_u$ |

[1S] Radzig AA, Smirnov BM, *Reference Data on Atoms, Molecules, and Ions*, Springer, 1985.

[2S] Pearse RWB and Gaydon AG 1976 *The Identification of Molecular Spectra*, Chapman and Hall (London, New York)
